# Supplementary material
Source: Royal Society of Chemistry journal article supplement (doi:10.1039/d5fo03197d)
Supplement: d5fo03197d1.pdf [file d5fo03197d1.pdf]

## Latent Class Analysis Results

Latent class analysis (LCA) was undertaken on baseline data (prior to randomisation) on responses (yes/no) to motives/goals in volunteering for the personalised nutrition intervention. Taking the diagonal probability value of 0.8 for class membership, LCA identified a three-class solution with three clear ordered levels of responses to goal items, with an entropy value of 0.671. The LO-MENDELLE-RUBIN ADJUSTED LRT TEST for 3 vs 4 classes indicated that the addition of a 4-classes would not be a statistically significant improvement (P-Value = 0.3041).

Class 1 indicated High goal orientation (30%); with class 2. showing a Moderate goal orientation (54%); and the final class comprising a group of individuals with Low goal orientation (17%). The % are based on the final class count and proportions for the latent classes. In class 1 (High goal orientation), four of the seven items had scale probabilities of over 95%, with the remaining three estimates having values of 63%, 57% & 65%. In class 2 (moderate goal orientation) none of the estimated class probabilities exceeded those in the first class. Goals selected were assigned 1, otherwise 0 and is represented in the LCA within Category 2 (see Supplementary Table 1 below). In class 3 the item responses were again all lower than in the previous class. Based on a 3-class model for the seven 'I want variables' BCH weights were obtained from within the LCA. This was so that the LCA information could be used as predictors within the model (N=1607, using MLR).

**Supplementary Table 1** – Results of Latent Class Analysis of Goal Responses. Class Counts and Proportions Latent Classes (labelled according to estimates in output below)

|   |     |                                         |
|---|-----|-----------------------------------------|
| 1 | 476 | 0.29620 – 30% High Goal Orientation     |
| 2 | 865 | 0.53827 – 53% Moderate Goal Orientation |
| 3 | 266 | 0.16553 – 17% Low Goal Orientation      |

RESULTS IN PROBABILITY SCALE

Two-Tailed

Estimate S.E. Est./S.E. P-Value

Latent Class 1 Estimates (below) imply that this is the high goal orientation class

IWANTK1R

|            |       |       |        |       |
|------------|-------|-------|--------|-------|
| Category 1 | 0.020 | 0.015 | 1.303  | 0.192 |
| Category 2 | 0.980 | 0.015 | 65.265 | 0.000 |

IWANTL2R

|            |       |       |        |       |
|------------|-------|-------|--------|-------|
| Category 1 | 0.372 | 0.031 | 12.195 | 0.000 |
| Category 2 | 0.628 | 0.031 | 20.571 | 0.000 |

IWANT4R

|            |       |       |        |       |
|------------|-------|-------|--------|-------|
| Category 1 | 0.432 | 0.037 | 11.571 | 0.000 |
| Category 2 | 0.568 | 0.037 | 15.196 | 0.000 |

IWANT5R

|            |       |       |        |       |
|------------|-------|-------|--------|-------|
| Category 1 | 0.035 | 0.024 | 1.418  | 0.156 |
| Category 2 | 0.965 | 0.024 | 39.443 | 0.000 |

IWANT6R

|            |       |       |        |       |
|------------|-------|-------|--------|-------|
| Category 1 | 0.026 | 0.021 | 1.248  | 0.212 |
| Category 2 | 0.974 | 0.021 | 46.516 | 0.000 |

IWANT7R

|            |       |       |        |       |
|------------|-------|-------|--------|-------|
| Category 1 | 0.347 | 0.033 | 10.406 | 0.000 |
| Category 2 | 0.653 | 0.033 | 19.554 | 0.000 |

IWANT8R

|            |       |       |        |       |
|------------|-------|-------|--------|-------|
| Category 1 | 0.011 | 0.024 | 0.464  | 0.642 |
| Category 2 | 0.989 | 0.024 | 40.526 | 0.000 |

Latent Class 2 Estimates (below) imply that this is the moderate goal orientation class

IWANTK1R

|            |       |       |        |       |
|------------|-------|-------|--------|-------|
| Category 1 | 0.213 | 0.018 | 11.779 | 0.000 |
| Category 2 | 0.787 | 0.018 | 43.562 | 0.000 |

IWANTL2R

|            |       |       |        |       |
|------------|-------|-------|--------|-------|
| Category 1 | 0.519 | 0.022 | 23.776 | 0.000 |
| Category 2 | 0.481 | 0.022 | 22.031 | 0.000 |
| IWANT4R    |       |       |        |       |
| Category 1 | 0.813 | 0.020 | 40.206 | 0.000 |
| Category 2 | 0.187 | 0.020 | 9.231  | 0.000 |
| IWANT5R    |       |       |        |       |
| Category 1 | 0.393 | 0.041 | 9.702  | 0.000 |
| Category 2 | 0.607 | 0.041 | 14.979 | 0.000 |
| IWANT6R    |       |       |        |       |
| Category 1 | 0.443 | 0.037 | 12.021 | 0.000 |
| Category 2 | 0.557 | 0.037 | 15.104 | 0.000 |
| IWANT7R    |       |       |        |       |
| Category 1 | 0.675 | 0.023 | 29.812 | 0.000 |
| Category 2 | 0.325 | 0.023 | 14.379 | 0.000 |
| IWANT8R    |       |       |        |       |
| Category 1 | 0.451 | 0.030 | 15.141 | 0.000 |
| Category 2 | 0.549 | 0.030 | 18.403 | 0.000 |

Latent Class 3 Estimates (below) imply that this is the low goal orientation class

|            |       |       |        |       |
|------------|-------|-------|--------|-------|
| IWANTK1R   |       |       |        |       |
| Category 1 | 0.507 | 0.059 | 8.624  | 0.000 |
| Category 2 | 0.493 | 0.059 | 8.394  | 0.000 |
| IWANTL2R   |       |       |        |       |
| Category 1 | 0.800 | 0.038 | 20.908 | 0.000 |
| Category 2 | 0.200 | 0.038 | 5.226  | 0.000 |
| IWANT4R    |       |       |        |       |
| Category 1 | 0.965 | 0.019 | 51.477 | 0.000 |
| Category 2 | 0.035 | 0.019 | 1.863  | 0.062 |
| IWANT5R    |       |       |        |       |
| Category 1 | 1.000 | 0.000 | 0.000  | 1.000 |
| Category 2 | 0.000 | 0.000 | 0.000  | 1.000 |
| IWANT6R    |       |       |        |       |

|            |       |       |        |       |
|------------|-------|-------|--------|-------|
| Category 1 | 0.964 | 0.035 | 27.242 | 0.000 |
| Category 2 | 0.036 | 0.035 | 1.016  | 0.309 |
| IWANT7R    |       |       |        |       |
| Category 1 | 0.877 | 0.030 | 29.089 | 0.000 |
| Category 2 | 0.123 | 0.030 | 4.095  | 0.000 |
| IWANT8R    |       |       |        |       |
| Category 1 | 0.821 | 0.051 | 15.937 | 0.000 |
| Category 2 | 0.179 | 0.051 | 3.486  | 0.000 |

Note: Category 1 represents data scored as 0. Category 2 represents data scored as 1, and where response to the goal item was positive.

## BCH Model Results

### (1) without Habit Strength

data\_4a\_lca\_bch\_weights\_total\_iwant\_m2\_6\_final\_12without habit\_

#### MODEL RESULTS

|                        |  | Two-Tailed |                |         |       |
|------------------------|--|------------|----------------|---------|-------|
|                        |  | Estimate   | S.E. Est./S.E. | P-Value |       |
| <b>Latent Class 1:</b> |  |            |                |         |       |
| HEISCOT6 ON            |  |            |                |         |       |
| COND                   |  | 4.588      | 1.315          | 3.488   | 0.000 |
| HEISCOT0               |  | 0.589      | 0.024          | 24.603  | 0.000 |
| Intercepts             |  |            |                |         |       |
| HEISCOT6               |  | 21.505     | 1.711          | 12.569  | 0.000 |
| Residual Variances     |  |            |                |         |       |
| HEISCOT6               |  | 56.576     | 2.679          | 21.120  | 0.000 |

### Latent Class 2:

|             |  |       |       |        |       |
|-------------|--|-------|-------|--------|-------|
| HEISCOT6 ON |  |       |       |        |       |
| COND        |  | 0.199 | 0.783 | 0.254  | 0.799 |
| HEISCOT0    |  | 0.589 | 0.024 | 24.603 | 0.000 |
| Intercepts  |  |       |       |        |       |

|                    |        |       |        |       |
|--------------------|--------|-------|--------|-------|
| HEISCOT6           | 23.218 | 1.360 | 17.075 | 0.000 |
| Residual Variances |        |       |        |       |
| HEISCOT6           | 56.576 | 2.679 | 21.120 | 0.000 |

**Latent Class 3:**

|                    |        |       |        |       |
|--------------------|--------|-------|--------|-------|
| HEISCOT6 ON        |        |       |        |       |
| COND               | -0.206 | 1.516 | -0.136 | 0.892 |
| HEISCOT0           | 0.589  | 0.024 | 24.603 | 0.000 |
| Intercepts         |        |       |        |       |
| HEISCOT6           | 22.659 | 1.816 | 12.477 | 0.000 |
| Residual Variances |        |       |        |       |
| HEISCOT6           | 56.576 | 2.679 | 21.120 | 0.000 |

**Categorical Latent Variables**

|       |       |       |        |       |
|-------|-------|-------|--------|-------|
| Means |       |       |        |       |
| C#1   | 2.074 | 0.100 | 5.095  | 0.000 |
| C#2   | 2.298 | 0.103 | 12.010 | 0.000 |

---

**(2) with Habit Strength**

data\_4a\_lca\_bch\_weights\_total\_iwant\_m2\_6\_final\_12

**MODEL RESULTS**

|                        |          | Two-Tailed |           |         |
|------------------------|----------|------------|-----------|---------|
|                        | Estimate | S.E.       | Est./S.E. | P-Value |
| <b>Latent Class 1:</b> |          |            |           |         |
| HEISCOT6 ON            |          |            |           |         |
| COND                   | 4.638    | 1.297      | 3.577     | 0.000   |
| HEISCOT0               | 0.548    | 0.026      | 21.155    | 0.000   |
| HABITT6                | 1.640    | 0.366      | 4.481     | 0.000   |
| HABITT6 ON             |          |            |           |         |
| HABITT0                | 0.519    | 0.030      | 17.129    | 0.000   |
| HEISCOT0               | 0.012    | 0.002      | 5.292     | 0.000   |
| HABITT0 WITH           |          |            |           |         |

|                    |        |       |        |       |
|--------------------|--------|-------|--------|-------|
| HEISCOT0           | 2.499  | 0.203 | 12.327 | 0.000 |
| Means              |        |       |        |       |
| HEISCOT0           | 48.044 | 0.631 | 76.199 | 0.000 |
| HABITTO            | 3.162  | 0.047 | 67.125 | 0.000 |
| Intercepts         |        |       |        |       |
| HEISCOT6           | 17.927 | 1.826 | 9.820  | 0.000 |
| HABIT6             | 1.083  | 0.134 | 8.060  | 0.000 |
| Variances          |        |       |        |       |
| HEISCOT0           | 97.077 | 3.636 | 26.701 | 0.000 |
| HABITTO            | 0.586  | 0.019 | 30.440 | 0.000 |
| Residual Variances |        |       |        |       |
| HEISCOT6           | 55.365 | 2.603 | 21.269 | 0.000 |
| HABIT6             | 0.313  | 0.018 | 17.225 | 0.000 |

**Latent Class 2:**

|              |        |       |         |       |
|--------------|--------|-------|---------|-------|
| HEISCOT6 ON  |        |       |         |       |
| COND         | 0.111  | 0.784 | 0.142   | 0.887 |
| HEISCOT0     | 0.548  | 0.026 | 21.155  | 0.000 |
| HABIT6       | 1.640  | 0.366 | 4.481   | 0.000 |
| HABIT6 ON    |        |       |         |       |
| HABITTO      | 0.519  | 0.030 | 17.129  | 0.000 |
| HEISCOT0     | 0.012  | 0.002 | 5.292   | 0.000 |
| HABITTO WITH |        |       |         |       |
| HEISCOT0     | 2.499  | 0.203 | 12.327  | 0.000 |
| Means        |        |       |         |       |
| HEISCOT0     | 49.198 | 0.418 | 117.693 | 0.000 |
| HABITTO      | 3.323  | 0.031 | 106.814 | 0.000 |
| Intercepts   |        |       |         |       |
| HEISCOT6     | 19.649 | 1.568 | 12.528  | 0.000 |
| HABIT6       | 1.114  | 0.128 | 8.704   | 0.000 |
| Variances    |        |       |         |       |
| HEISCOT0     | 97.077 | 3.636 | 26.701  | 0.000 |

|                              |        |       |        |       |
|------------------------------|--------|-------|--------|-------|
| HABITT0                      | 0.586  | 0.019 | 30.440 | 0.000 |
| Residual Variances           |        |       |        |       |
| HEISCOT6                     | 55.365 | 2.603 | 21.269 | 0.000 |
| HABITT6                      | 0.313  | 0.018 | 17.225 | 0.000 |
| <b>Latent Class 3:</b>       |        |       |        |       |
| HEISCOT6 ON                  |        |       |        |       |
| COND                         | -0.268 | 1.508 | -0.177 | 0.859 |
| HEISCOT0                     | 0.548  | 0.026 | 21.155 | 0.000 |
| HABITT6                      | 1.640  | 0.366 | 4.481  | 0.000 |
| HABITT6 ON                   |        |       |        |       |
| HABITT0                      | 0.519  | 0.030 | 17.129 | 0.000 |
| HEISCOT0                     | 0.012  | 0.002 | 5.292  | 0.000 |
| HABITT0 WITH                 |        |       |        |       |
| HEISCOT0                     | 2.499  | 0.203 | 12.327 | 0.000 |
| Means                        |        |       |        |       |
| HEISCOT0                     | 51.020 | 0.779 | 65.512 | 0.000 |
| HABITT0                      | 3.471  | 0.061 | 57.278 | 0.000 |
| Intercepts                   |        |       |        |       |
| HEISCOT6                     | 18.993 | 1.920 | 9.891  | 0.000 |
| HABITT6                      | 1.104  | 0.142 | 7.803  | 0.000 |
| Variances                    |        |       |        |       |
| HEISCOT0                     | 97.077 | 3.636 | 26.701 | 0.000 |
| HABITT0                      | 0.586  | 0.019 | 30.440 | 0.000 |
| Residual Variances           |        |       |        |       |
| HEISCOT6                     | 55.365 | 2.603 | 21.269 | 0.000 |
| HABITT6                      | 0.313  | 0.018 | 17.225 | 0.000 |
| Categorical Latent Variables |        |       |        |       |
| Means                        |        |       |        |       |
| C#1                          | 0.662  | 0.096 | 5.288  | 0.000 |
| C#2                          | 1.423  | 0.098 | 12.529 | 0.000 |

---
